# Supplementary material for: Exon and junction microarrays detect widespread mouse strain- and sex-bias expression differences
Source: PubMed Central journal article supplement (PMC2432077; doi:10.1186/1471-2164-9-273), 2008-06-04
Supplement: 1471-2164-9-273-S1.pdf [file 1471-2164-9-273-S1.pdf]

### 3' GENE EXPRESSION PROFILING

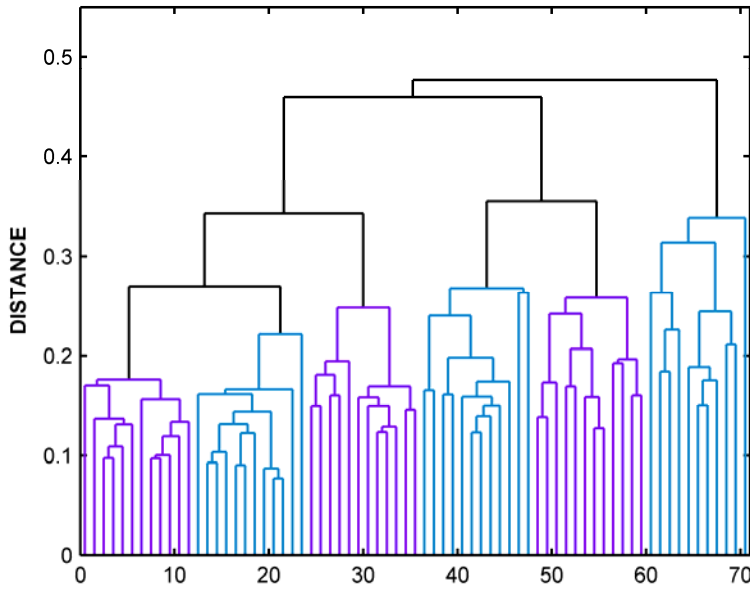

**STRAIN**

**DBA/2J**

**C3H/HeJ**

**C57BL/6J**

**DBA/2J**

**C3H/HeJ**

**C57BL/6J**

**SEX**

**Male**

**Male**

**Male**

**Female**

**Female**

**Female**
